# Supplementary material for: Effect of curing conditions on the water vapor sorption behavior of melamine formaldehyde resin and resin-modified wood
Source: Springer Nature journal article supplement (doi:10.1007/s10853-020-04814-0), 2020-05-18
Supplement: MOESM1 [file 17994096]

## Supplementary material

### Effect of curing conditions on the water vapor sorption behavior of melamine formaldehyde resin and resin-modified wood

Michael Altgen<sup>1\*</sup>; Daniela Altgen<sup>1</sup>, André Klüppel<sup>2</sup>, Lauri Rautkari<sup>1</sup>

<sup>1</sup> Department of Bioproducts and Biosystems, Aalto University, P.O. Box 16300, 00076 Aalto, Finland

<sup>2</sup> Georg-August University of Göttingen, Faculty of Forest Science and Forest Ecology, Wood Biology and Wood Products, Büsgenweg 4, 37077 Göttingen, Germany

\*corresponding author: michael.altgen@aalto.fi

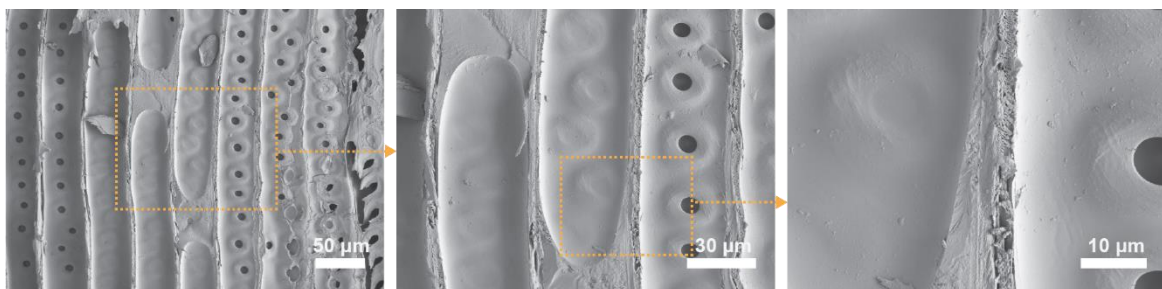

Fig. S. 1: SEM images of the radial surface in dry cured wood that was treated using an impregnation solution with 25 % solid content. The images show that the MF resin has formed a smooth layer on the cell wall surface, which also covered the pits.

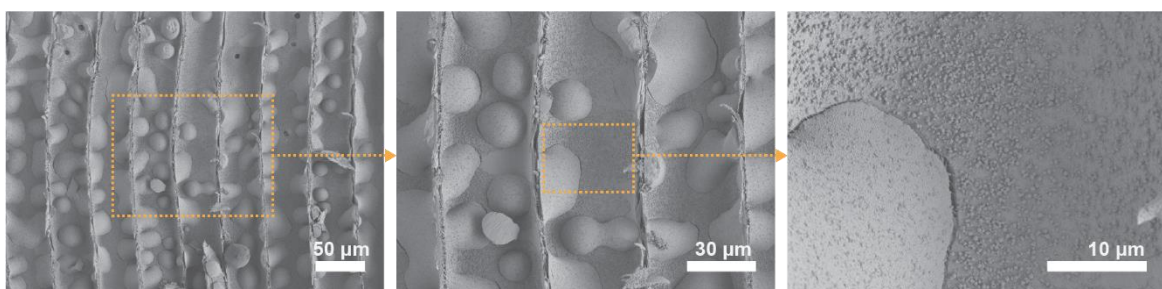

Fig. S. 2: SEM images of the radial surface in wet cured wood that was treated using an impregnation solution. The images show that the MF resins have formed droplets on the cell wall surface. Besides droplets with sizes in the micrometer range, small droplets with diameters in the nanometer range are visible.

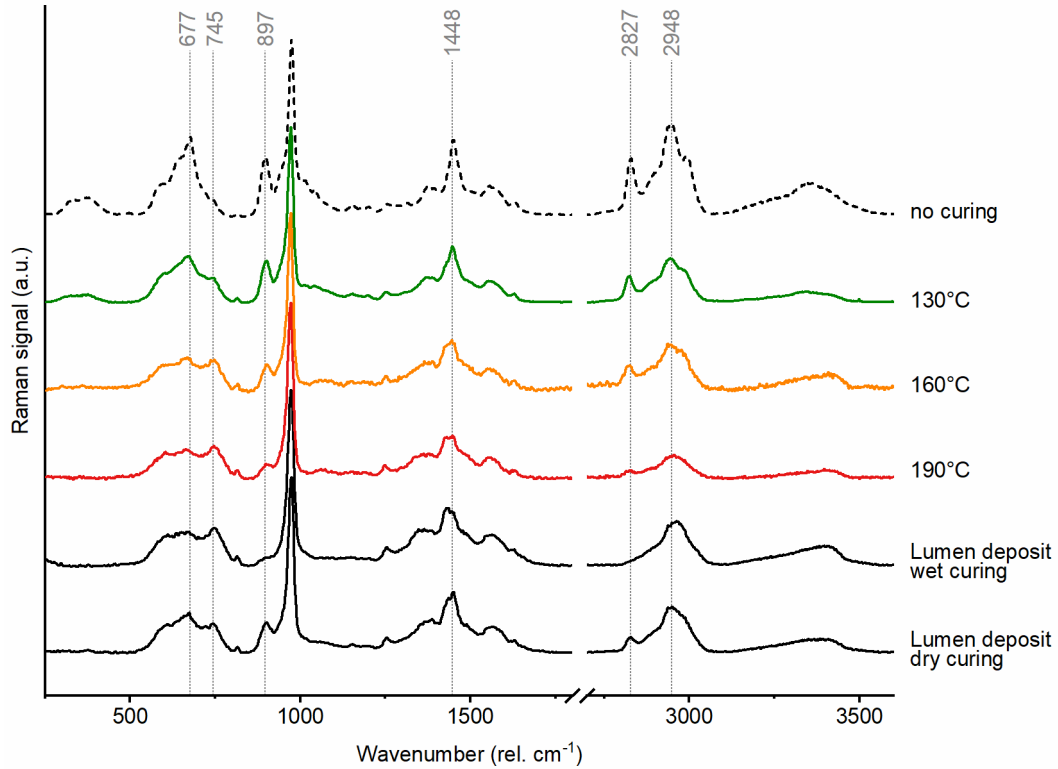

Fig. S. 3: Raman spectra of MF resin cured at different conditions. The Raman spectra of uncured MF resin and resin cured at 130-190 °C for 1 h were collected in the present study. The Raman spectra of MF resin in the cell lumen of wet and dry cured wood are derived from a previous study [1]. All spectra were baseline corrected and normalized to the intensity at ca. 974  $\text{cm}^{-1}$ .

Table S. 1:  $\text{MC}_R$  (%) measured at different climatic conditions over different aqueous salt solutions or calculated from the DVS data.

| Solid content | Curing | $\text{MC}_R$ at 33 % RH (%) |                  |          | $\text{MC}_R$ at 79% RH (%) |                  |          | $\text{MC}_R$ at 95 % RH (%) |                  |          |
|---------------|--------|------------------------------|------------------|----------|-----------------------------|------------------|----------|------------------------------|------------------|----------|
|               |        | $\text{MgCl}_2$              | DVS <sup>a</sup> | $\Delta$ | $\text{NH}_4\text{Cl}$      | DVS <sup>a</sup> | $\Delta$ | $\text{KNO}_3$               | DVS <sup>b</sup> | $\Delta$ |
| 0 %           | Dry    | 5.6 (.04)                    | 5.3              | 0.3      | 13.3 (.11)                  | 13.2             | 0.1      | 20.7 (.12)                   | 22.9             | -2.2     |
|               | Wet    | 5.7 (.01)                    | 5.4              | 0.3      | 13.4 (.06)                  | 13.2             | 0.1      | 21.1 (.12)                   | 22.9             | -1.8     |
| 10 %          | Dry    | 6.0 (.08)                    | 6.0              | 0.0      | 13.5 (.17)                  | 13.2             | 0.3      | 19.4 (.37)                   | 20.7             | -1.3     |
|               | Wet    | 6.4 (.04)                    | 6.3              | 0.1      | 14.4 (.08)                  | 14.4             | 0.0      | 21.2 (.07)                   | 22.8             | -1.7     |
| 25 %          | Dry    | 6.4 (.08)                    | 6.2              | 0.2      | 14.0 (.24)                  | 13.1             | 0.9      | 19.6 (.43)                   | 19.8             | -0.2     |
|               | Wet    | 7.8 (.04)                    | 7.2              | 0.6      | 16.7 (.11)                  | 15.6             | 1.1      | 23.2 (.21)                   | 24.1             | -0.9     |

<sup>a</sup>  $\text{MC}_R$  obtained by linear interpolation; <sup>b</sup>  $\text{MC}_R$  at 95% target RH

## Reference

- [1] Altgen M, Awais M, Altgen D, Klüppel A, Mäkelä M, Rautkari L (2020) Distribution and curing reactions of melamine formaldehyde resin in cells of impregnation-modified wood. *Sci. Rep.* 10(3366):1–10.
